# Supplementary material
Source: PubMed Central journal article supplement (PMC10339224)
Supplement: jamapsychiatry-e232195-s002.pdf [file jamapsychiatry-e232195-s002.pdf]

## Data Sharing Statement

Overhage. Trends in Acute Care Use for Mental Health Conditions Among Youth During the COVID-19 Pandemic. *JAMA Psychiatry*. Published July 12, 2023.

doi:10.1001/jamapsychiatry.2023.2195

**Data:** OptumLabs Data Warehouse

**Data available:** No. In accordance with our Data Use Agreement with OptumLabs Data Warehouse, the data used for this study will not be made publicly available.
